# Supplementary material for: Structure of bacterial phospholipid transporter MlaFEDB with substrate bound
Source: eLife journal article supplement (doi:10.7554/elife.62518), 2020-11-25

A

MlaE  
*E. coli* (Gram -ve)  
 Phospholipid

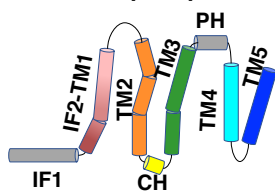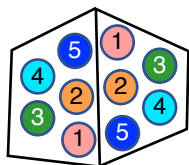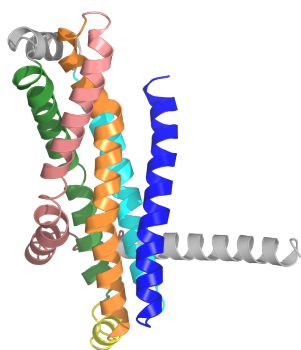

B

Wzm  
*A. aeolicus* (Gram -ve)  
 O-antigen

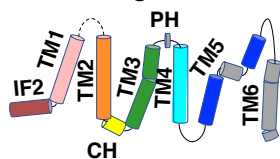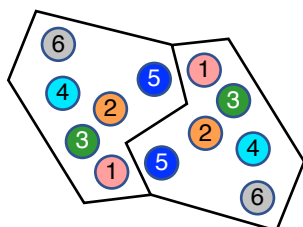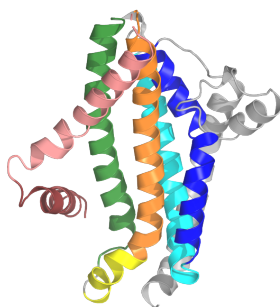

C

TarG  
*A. herbarius* (Gram +ve)  
 Teichoic acid

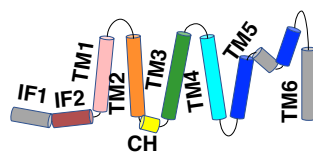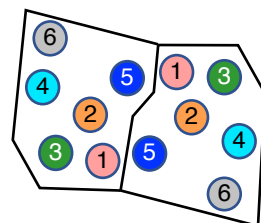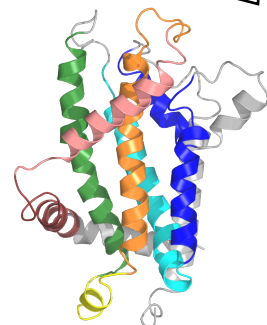

D

ABCA1 (TMD2 shown)  
*H. sapiens*  
 Lipid

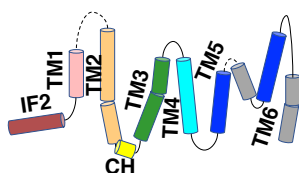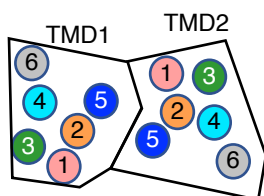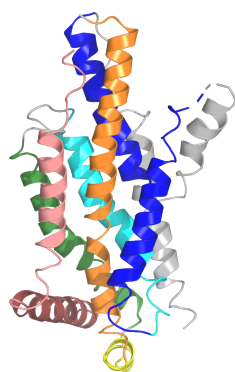

E

ABCG5/G8 (G8 shown)  
*H. sapiens*  
 Cholesterol

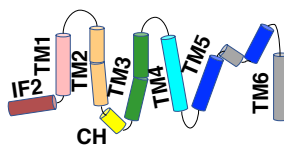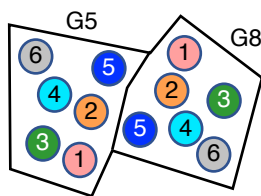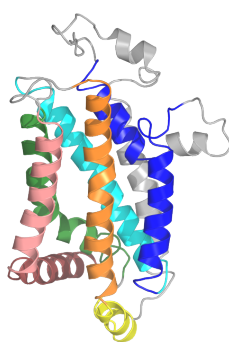

F

ABCG2  
*H. sapiens*  
 Multi-drug

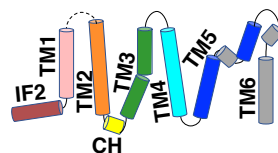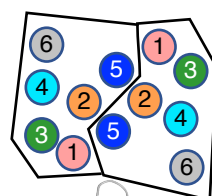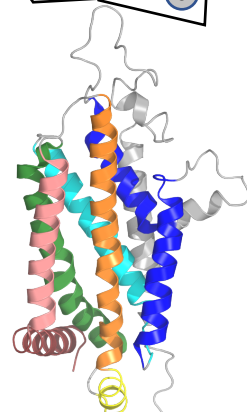

Supplement: supp [file elife-62518-supp-v1.zip › elife_poa_e62518_Figure_2_figure_supplement_1.pdf]
