# Supplementary material for: Structure of bacterial phospholipid transporter MlaFEDB with substrate bound
Source: eLife journal article supplement (doi:10.7554/elife.62518), 2020-11-25
Supplement: supp [file elife-62518-supp-v1.zip]

Archive with 22 entries (22 files):
- elife_poa_e62518_Transparent_Reporting_File.docx
- elife_poa_e62518_Figure_1_figure_supplement_1.pdf
- elife_poa_e62518_Figure_1_figure_supplement_2.pdf
- elife_poa_e62518_Figure_1_figure_supplement_3.pdf
- elife_poa_e62518_Figure_1_figure_supplement_4.pdf
- elife_poa_e62518_Figure_1_figure_supplement_5.pdf
- elife_poa_e62518_Figure_2_figure_supplement_1.pdf
- elife_poa_e62518_Figure_2_figure_supplement_2.pdf
- elife_poa_e62518_Figure_3_figure_supplement_1.pdf
- elife_poa_e62518_Figure_3_figure_supplement_2.pdf
- elife_poa_e62518_Figure_3_figure_supplement_3.pdf
- elife_poa_e62518_Figure_4_figure_supplement_1.pdf
- elife_poa_e62518_Figure_4_figure_supplement_2.pdf
- elife_poa_e62518_Figure_4_figure_supplement_3.pdf
- elife_poa_e62518_Figure_4_figure_supplement_4.pdf
- elife_poa_e62518_Figure_4_figure_supplement_5.pdf
- elife_poa_e62518_Figure_5_figure_supplement_1.pdf
- elife_poa_e62518_Figure_5_figure_supplement_2.pdf
- elife_poa_e62518_Supplementary_file_1.docx
- elife_poa_e62518_Supplementary_file_2.docx
- elife_poa_e62518_Supplementary_file_3.xlsx
- elife_poa_e62518_Supplementary_file_4.docx
