# Supplementary material for: Structure of bacterial phospholipid transporter MlaFEDB with substrate bound
Source: eLife journal article supplement (doi:10.7554/elife.62518), 2020-11-25
Supplement: supp [file elife-62518-supp-v1.zip › elife_poa_e62518_Figure_2_figure_supplement_2.pdf]

A

**MacB**  
*A. Baumannii* (Gram +ve)  
 Macrolides

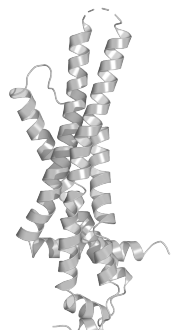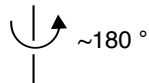

**Wzm**  
*A. aeolicus* (Gram -ve)  
 O-antigen

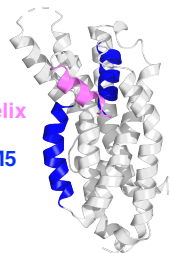

reentrant helix

TM5

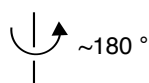

**ABCG2**  
*H. sapiens*  
 Multi-drug

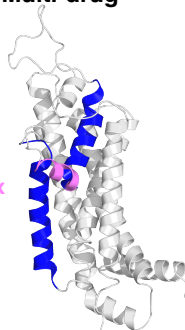

reentrant helix

TM5

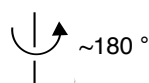

**MlaE**  
*E. coli* (Gram -ve)  
 Phospholipids

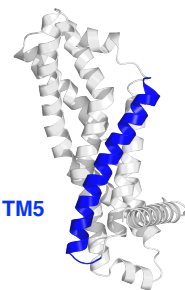

TM5

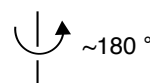

**LptG**  
*E. coli* (Gram -ve)  
 LPS

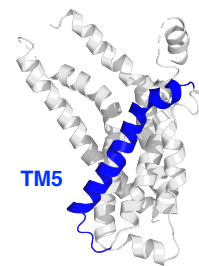

TM5

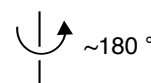

B

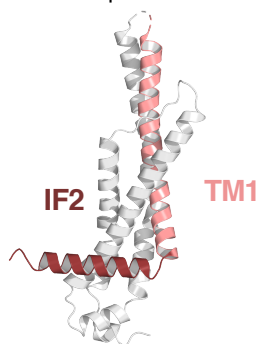

IF2

TM1

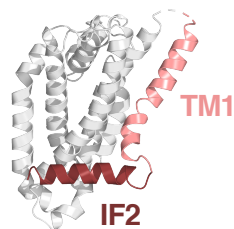

TM1

IF2

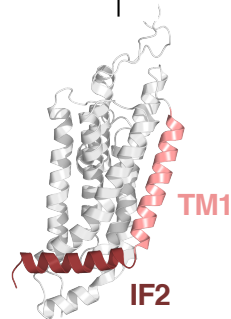

TM1

IF2

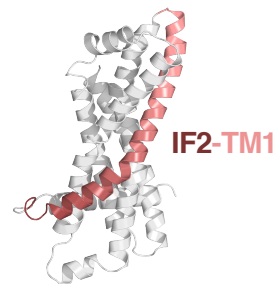

IF2-TM1

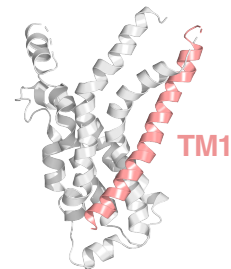

TM1

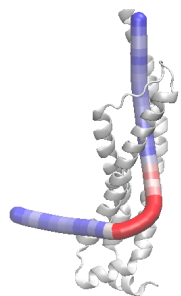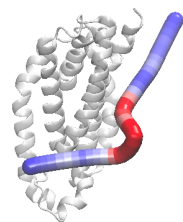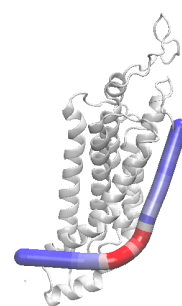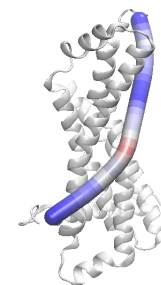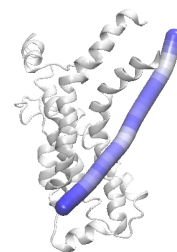

curvature

straight

angled
