# Supplementary material for: Structure of bacterial phospholipid transporter MlaFEDB with substrate bound
Source: eLife journal article supplement (doi:10.7554/elife.62518), 2020-11-25
Supplement: supp [file elife-62518-supp-v1.zip › elife_poa_e62518_Figure_3_figure_supplement_1.pdf]

**A**

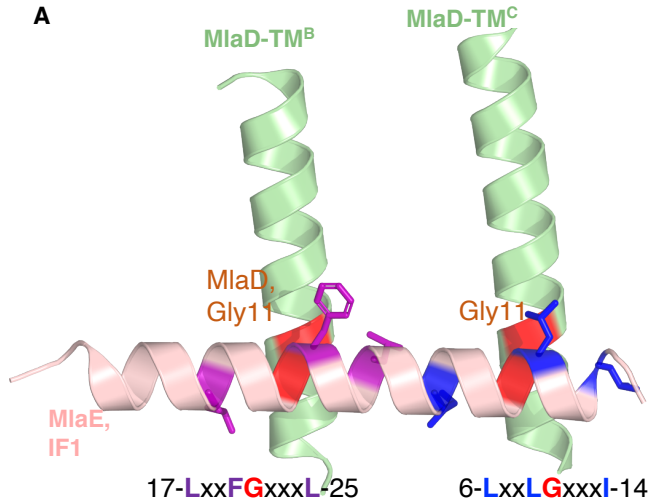

**C**

## MlaE

*E. coli* EIQ68638.1/1-260 /1-260  
*R. rickettsii* AFB22698.1/1-259  
*N. moscovicensis* ALA57157.1/1-256  
*F. tularensis* WP 003035471.1/1-254  
*N. gonorrhoeae* WP 071197969.1/1-258  
*A. baumannii* WP 001091949.1/1-258  
*B. cepacia* AIO25368.1/1-255  
*L. pneumophila* AMP90450.1/1-260  
*P. luteoviolacea* AOT09786.1/1-258  
*V. cholerae* AAF95661.1/1-258  
*K. pneumoniae* AAC04150949.1/1-260  
*H. influenzae* AAC22742.1/1-261  
*P. aeruginosa* KEA30503.1/1-265

10 20 30 40 50 60 70 80  
 ---MLLNALASLHKGIKTLRTFRAGLMLFNALVGKPEFRKHAPLVRQLYNVGVLSMLIIIVSGVFIGMVGLGYLVLTTTYSAETSLGM  
 ---MLFNIANSVKRTVKFAQSVGSFSLFSAFAVSSIIRPPLYLSLIIRQLLFIGFHSPLPVVAMTTFFSGAVLALSYIGFSRFSAESSIAT  
 ---MHLIRIEAFVLKYVYEGMRMLIFVLSFAFWILRPLRFAQIMQKVHFIGYKSTFVVLITAGTTGMVLGCGYYTLRKFSGSEALLG  
 ---MTIFISKVYTLTFSLYLSLVKALSLLRIVISKLNIRD---CIIQIKVAGVNSIIIVTSGVFIGLVLSCGYGYTLRKFGAHSLGLV  
 ---MNFIRSVKAKTLGFIQSLGSITLFLNLIKASGTAFVRPRLSVRQVYFAGVLSVLIVAVSGLVFGMVGLGCGYTQLSKFKSADILGY  
 ---MNTIAWLGRVLIERTIGTCVAAALMLITQIFLPSLAGRGFRGFVYQMRHVGMVSLIIITVSGLFIGLVLGCGYSLIVNVGSESLGL  
 ---MISAIKRLVYIGGLERAGYGRTLRFVLRLVEFFPLLRGRPRPLVTQIIFHLGNYSFVIIVAGSLFGVFGVLGCGYYTLNRNGYSQAALG  
 ---MLDTIARLNRGVRAQLQGISGLFLFSMLFRKPNVRLRWPLVRYQLYFIGVLSCSLIIIVSALFIGMVVGLGCGYNTLQKFGASSQLQG  
 ---MDFLQKLGKRTLNRFPASTCRATQMLLGLALLNPVLRQKPTPLIKQLYMHVGHQSLIIIMVSGLFIGMVIALGCGYTVLVDYGAEDSLGP  
 ---MRWVSSPLERCTLAVSETFRASLMLFGALVGRQPIRHFFPLVLVRLYSIGVQSLAIIVTSGVFIGMVGLGCGYVILVDYGAETSLGP  
 ---MLFNALAAALHGRGIKTATFRAGLMLFNNAVVGKPEFRKHAPLVRQLYNVGVLSMLIIIVSGVFIGMVGLGCGYVLTTTYSAETSLGM  
 ---MIVNFISALQGVQIDFFRALGRAGFMLFGALIGKPPTRKHFFPLLVQMHVGLVQVSLIILSLGSLFIGMVGLGCGYVILIDFSAETSLQG  
 MRRVSPLEIRLRLRAGLDVVAAALGRSTLFLGHALLGRPTGTGLHLVLKVLISYSGVLSLAIIVTSGVFIGMVGLGCGYNILISYSGSQAQV

*E. coli* EIQ68638.1/1-260 /1-260  
*R. rickettsii* AFB22698.1/1-259  
*N. moscovicensis* ALA57157.1/1-256  
*F. tularensis* WP 003035471.1/1-254  
*N. gonorrhoeae* WP 071197969.1/1-258  
*A. baumannii* WP 01091949.1/1-258  
*B. cepacia* AIO25368.1/1-255  
*L. pneumophila* AMP90450.1/1-260  
*P. luteoviolacea* AOT09786.1/1-258  
*V. cholerae* AAF95661.1/1-258  
*K. pneumoniae* WP 004150949.1/1-260  
*H. influenzae* AAC22742.1/1-261  
*P. aeruginosa* KFA30503.1/1-265

90 100 110 120 130 140 150 160 170 180

LVALSLLRELGPVVAALLFAGRAGSALTAEIGLMRATEQLSSMEMMAVDPLRRVISPRFWAGVISLPLLTIVFVAVGIWGGSLVGVSWKGIIDS  
VVVLSLTLRELGPVLAGLMVAGRVGASIAAEIATMRVTEQVDALYTLSTDPIKYLVFPRVITAIITMPCLVLIIGDIIIGVMGGYLVGVYKLDPNS  
AVALSMLRELGPVLAALMVTARAGSAMTAETIGMIRTEIQIDALDITAMVNPQLYLIAPKLVAGCIGVPLLVAFIDFVGVYIGYGLVGVDDLGVSA  
MVALSVLRELGPVVTALLFAGRACSSITSEIGLMKATQDINSLKVMNVNPTISFLSTRFWACMISGPILLAFIVASVAILGAFILAEALGTSI  
MVAASLLRELGPVLAAILFASSAGGAMTSEIGLMKTTQELEANMVMVAVNPVARVVPFRFWAGVFSMPLLASIFNVAGIFGAYLVGVSWLGLDS  
MVSLTLRELAPVVAALLFAGRAGSALTAEIGSMKQSEQLASMEMIGVDPLKQIVSPRLWAGIVSLPLMTYIFAAIGVGGKLVGVDFLGVDE  
LVALSVLRELGPVVTALLFAGRAGTSALTAEIGLMKAGEQLTALEMMAVDPIKNVIAPRWLAGIITAMPLLAIFNAFVGVYIGYGVFVGVILGVDP  
LLALSVAELRGPVISALLFAGRAGSALTAEIGLMKATEQLSSMDMMGVDPGRVVYPRFWAGFIALPILALIFSAAVIYGGYFIGVYWLGVDA  
LVALSLLRELGPVVTALLFAGRAGSALTAEIGLMKATEQLSSLEMAVDPLKRVVAPRFWAGFISMPLLALIFSAVAILGAGLVGVDDLGVDS  
MVALSVLRELGPVVTALLFAGRAGSALTAEIGLMKATEQLSSLEMAVDPLKRVVAPRFWAGFISMPLLAMIFNAFVGVYIGYGLVGVDFWKGKID  
LVALSLLRELGPVVAALLFAGRAGSALTAEIGLMRATEQLSSMEMMAVDPLRRVISPRFWAGVISLPLLTIIIFVAVGIWGGALVGVSWKGIIDG  
LVALSLLRELGPVVTALLFAGRAGSALTAEIGLMKATEQLSSLEMAVDPLRRVAPRFWAGVISMPVLSILTAIGVGGKLVGVDFWKGKIDS  
MVALTLRELGPVVTGLFAGPAGSALTAEIIGNMKATEQLSSLEMGVDPIKYVAPRWLAGFISMPLLAATFSVVGIVGGGAMVADWLGVYE

E. coli EIQ68638.1/1-260 /1-260  
R. rickettsii AFB22698.1/1-259  
N. moscoviciensis ALA57157.1/1-256  
F. tularensis WP 003035471.1/1-254  
N. gonorrhoeae WP 071197969.1/1-258  
A. baumannii WP 001091949.1/1-258  
B. cepacia AIO25368.1/1-255  
L. pneumophila AMP90450.1/1-260  
P. luteoviolacea AOT09786.1/1-258  
V. cholerae AAF95661.1/1-258  
K. pneumoniae AAC 004150949.1/1-260  
H. influenzae AAC22742.1/1-261  
P. aeruginosa KEA30503.1/1-265

190 200 210 220 230 240 250 260  
 GFFWSAMQNAVDWRMDLVNCLISLVFAITVTWISLFNGYDAIPTSGAGISRATTRTVVHSSSLAVLGLDFVLALMFGN-  
 AAYLTSTFOYLE-PIDIVISGLVAGVPGFIIISISCYSGYSGKGAKGVGRATTSAVVNSSILILISNYLIELFFKV-  
 GSYWSTIESIAVEWK-DVYGGILSVSPGLVIVSWCCYKGFYTRMSAEGLTATTEAVLSSVLILVWDYFLTSVLL---  
 GFWSNIIQSSVT-ASDLSNGILSIVFAITWIALYQGYCIPDSNGIAKATKTVVVCYSGVLGADLILISMFGV  
 GIFWSQMNNITIHYDVINGLISAAFGVAVTLIAVHQGFHCVPTSEGILRASTRTVVSSALTILAVDFILTAMMFTD-  
 GFSWGMQNNVQFGHVDVNGVILSIVFAICTWIAVFPQYACDTPPEGATAMTRTVVSSYSLCVGDFVFLTAVMFGF-  
 GAFWSQMGQGVGVWADVNGVIGSIVFGFAVTLIALFGQYEAKEPTPEGVSRASTRTVVVASLAVLGLDFLLALMFS--  
 GSFWSNMQAAVNFRIDILSGIISLVFAFVVTWISVFGFECVPTAEGISHATKTVVYSSSLAVLGLDFLLTAMMIGDW  
 GSFWSIMQSQVSLQDDILNGLISVFAFALVTWIALYKGYDCPTSEGISKATETTVVHSSSLAVLGFDFVLTAVMFS-  
 GFSWASAMQASVELQDIGNSTICFVFAFVTWIALFNGYDAIPTSEGISRATTRTVVHSSSLAVLGLDFVLALMFGN-  
 GFFWSAMQNAVDWRMDLVNCLISLVFAITVTWIALFNGYDAIPTSGAGISRATTRTVVHASLAVLGLDFVLALMFGN-  
 GFSWVMQNNVSVSYDILNGFISVFFAVAVTWIALFNGYDCMPTSEGISQATTRTVVHASLAVLGLDFILTAMFGAG  
 GSFWANMNSQVSTEDLVNGVILSIVFAFVTWIAVQGYDCPTSEGISRATTRTVVVASLAVLGLDFILALMFGDF
