# Supplementary figures and images for: Structure of bacterial phospholipid transporter MlaFEDB with substrate bound
Source: eLife journal article supplement (doi:10.7554/elife.62518), 2020-11-25

Relion 2.1

CryoSparc v0.6

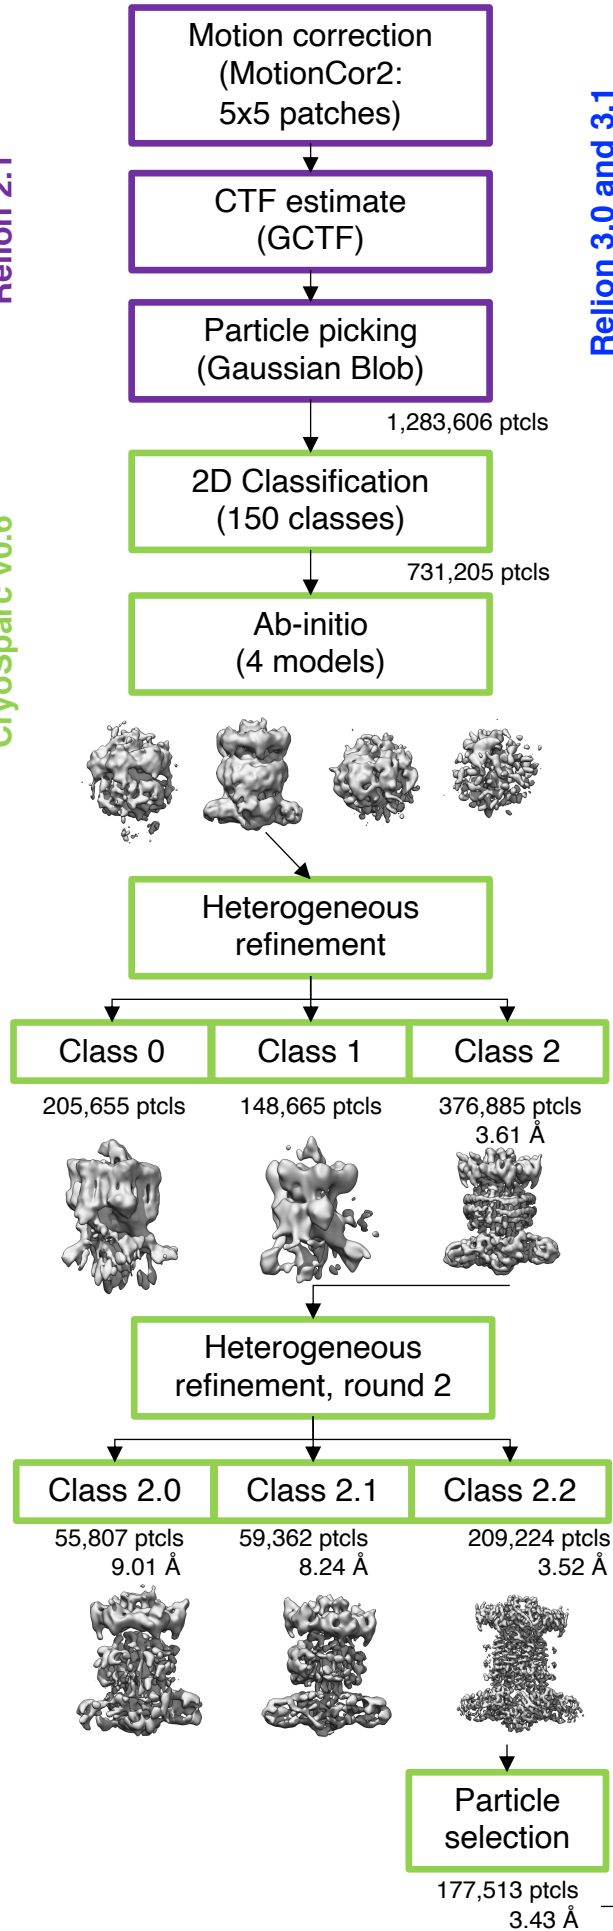

Relion 3.0 and 3.1

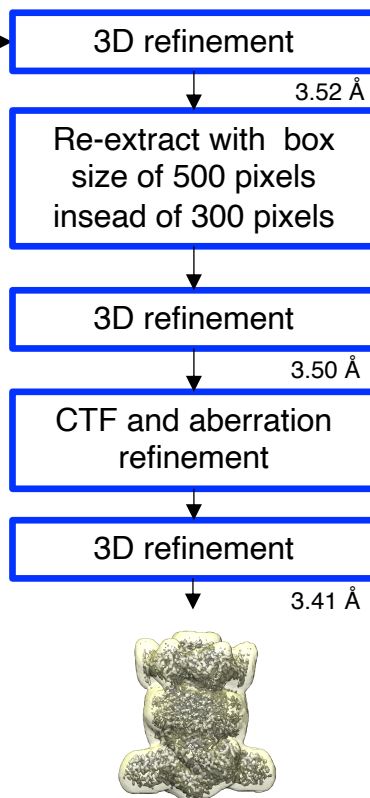

CryoSparc v2.12

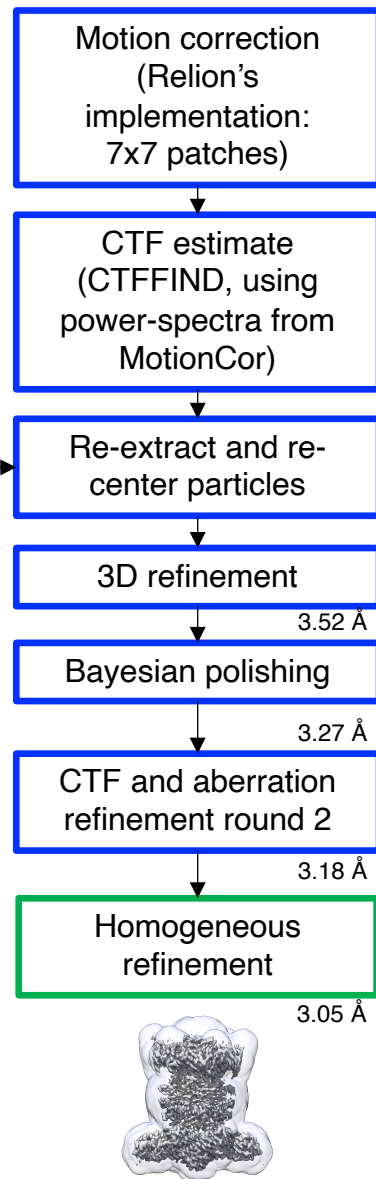

Supplement: supp [file elife-62518-supp-v1.zip › elife_poa_e62518_Figure_1_figure_supplement_1.pdf]

**A**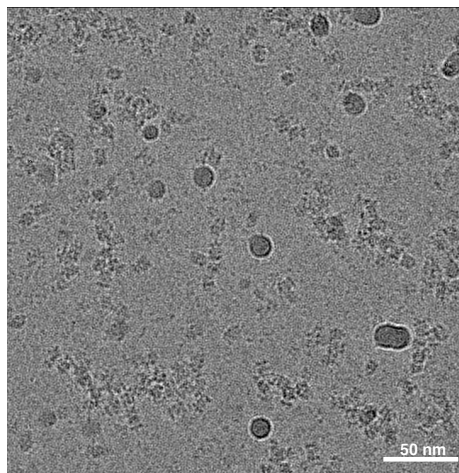**B**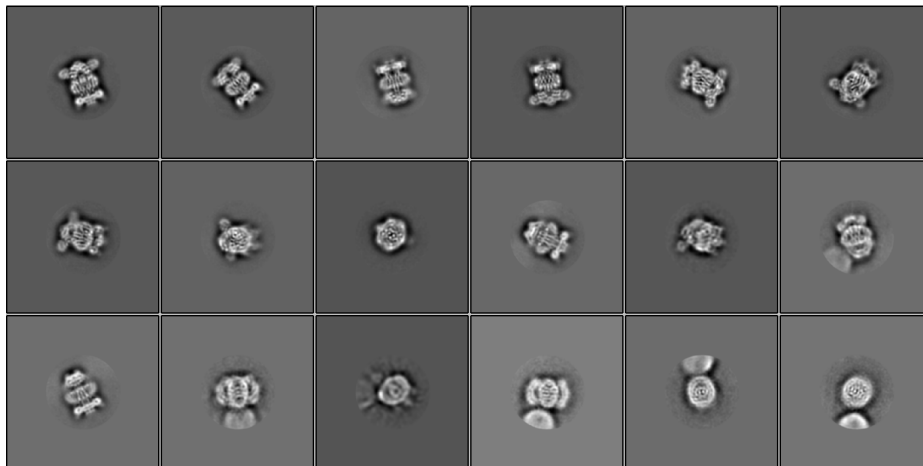**C**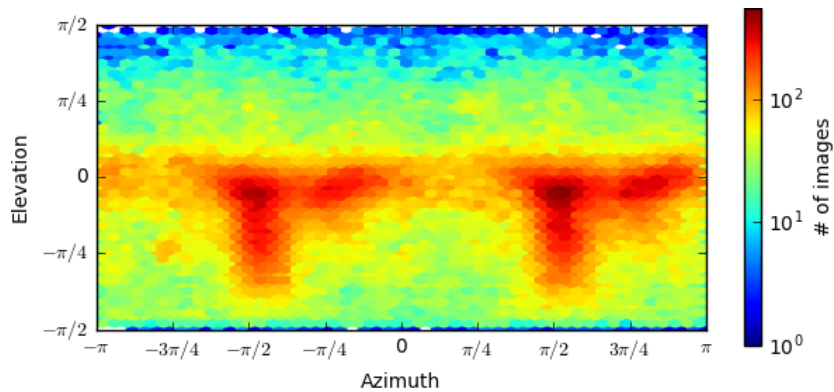**D**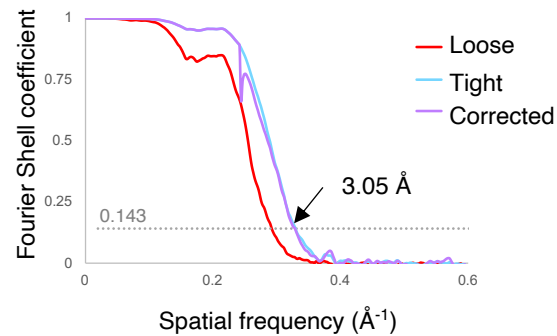

Supplement: supp [file elife-62518-supp-v1.zip › elife_poa_e62518_Figure_1_figure_supplement_2.pdf]

A

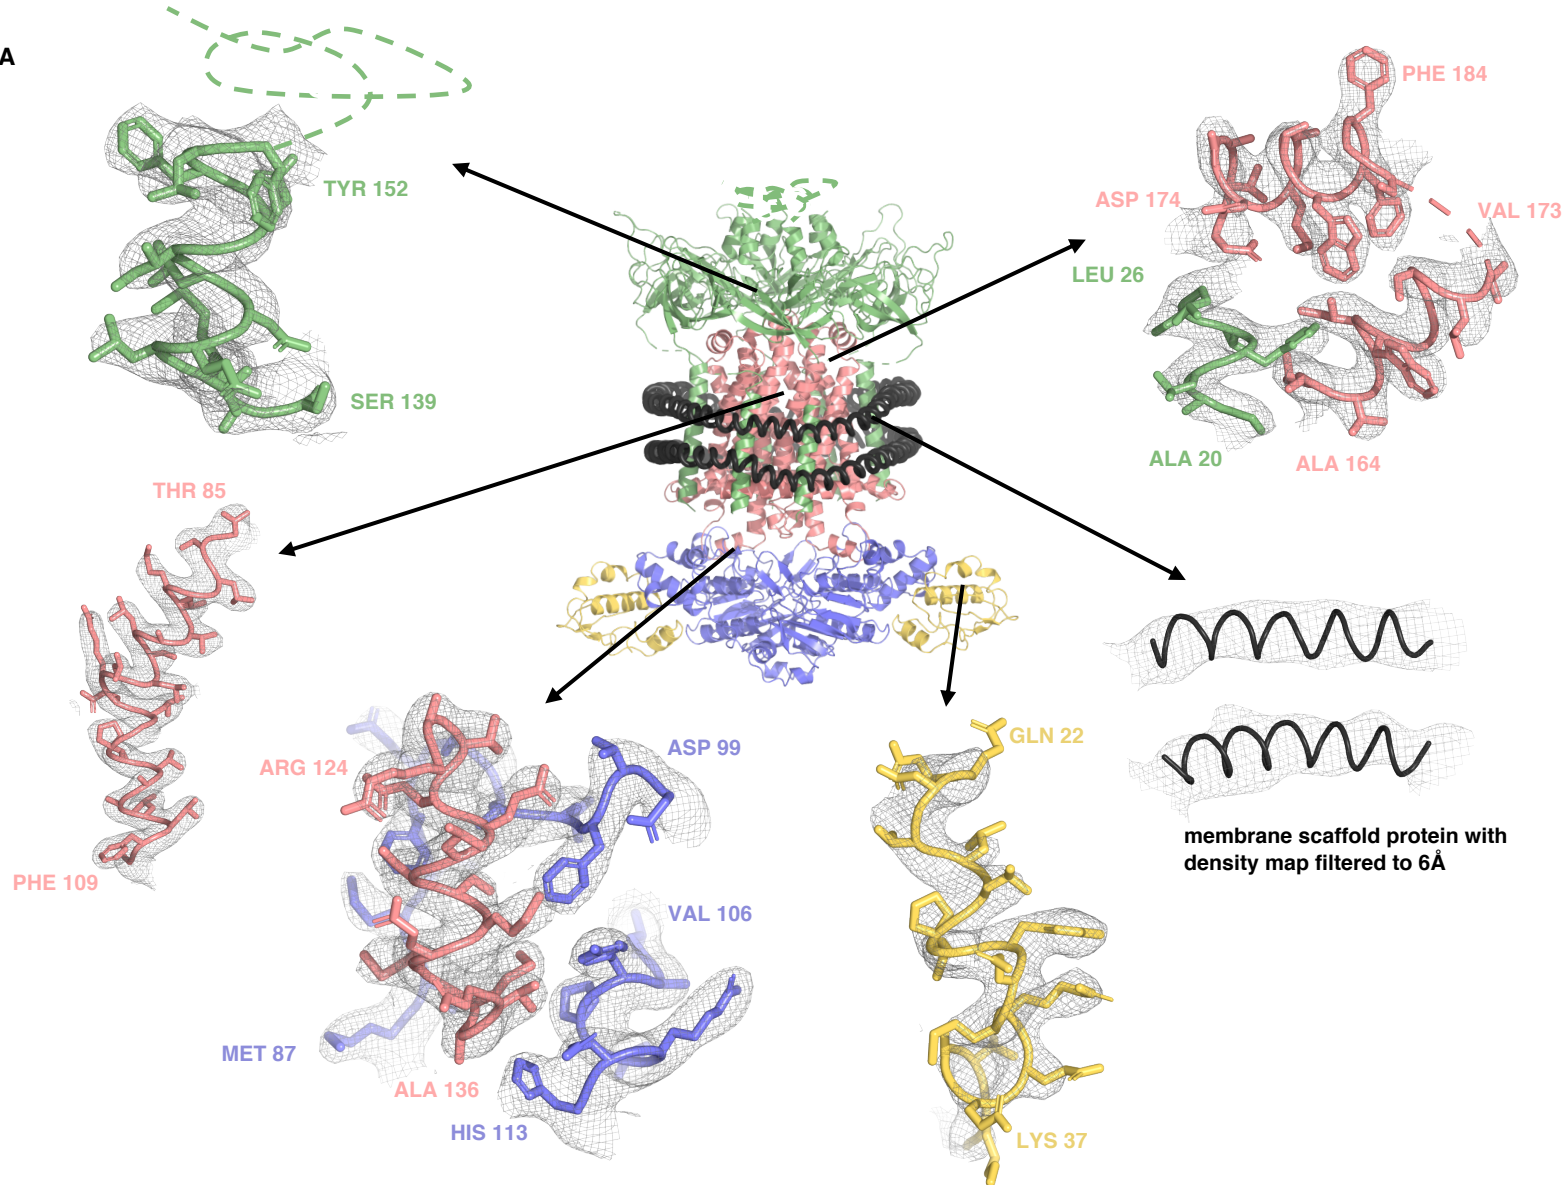

B

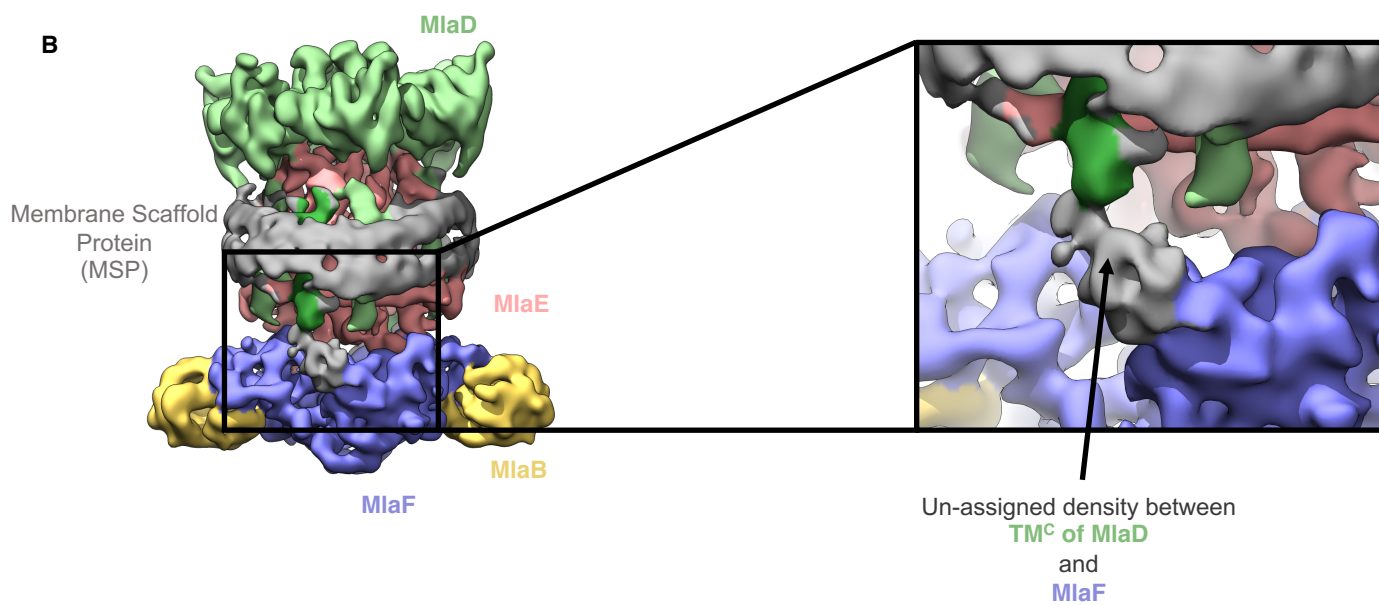

Supplement: supp [file elife-62518-supp-v1.zip › elife_poa_e62518_Figure_1_figure_supplement_3.pdf]

A

# Movements of $\alpha$ -carbon between EM and X-Ray maps

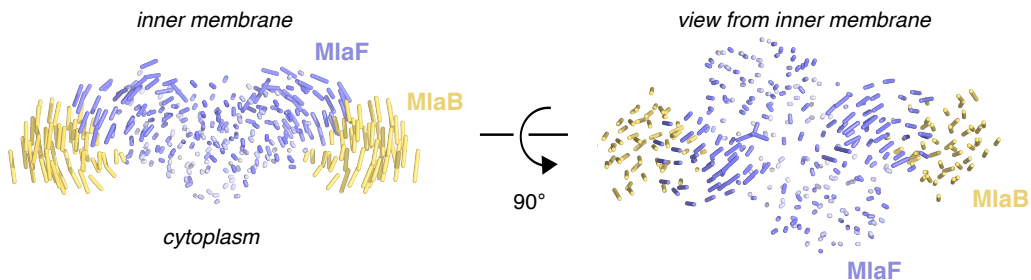

B

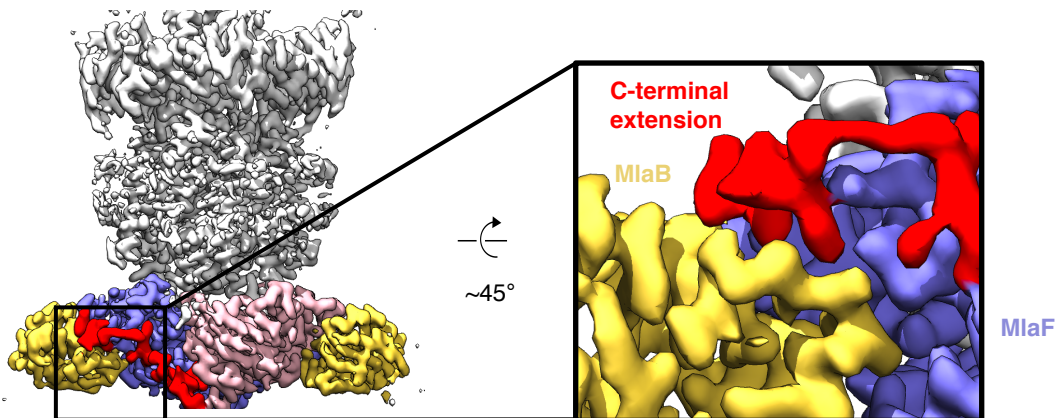

C

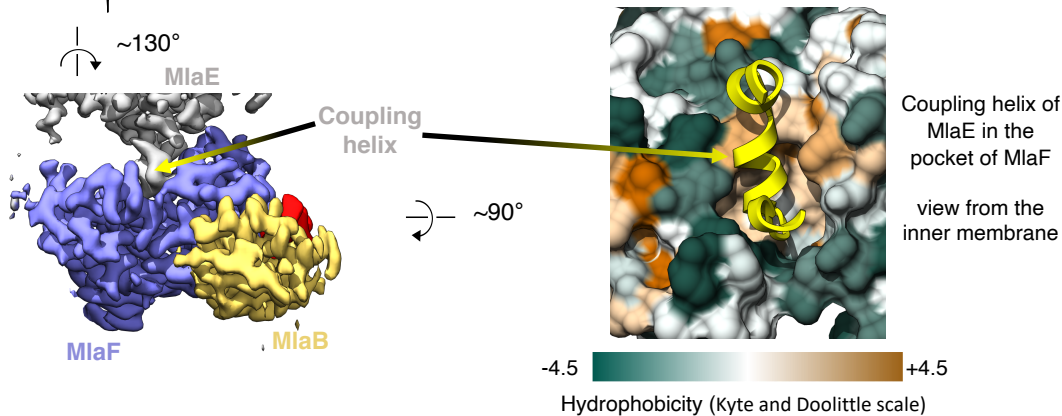

Supplement: supp [file elife-62518-supp-v1.zip › elife_poa_e62518_Figure_1_figure_supplement_4.pdf]

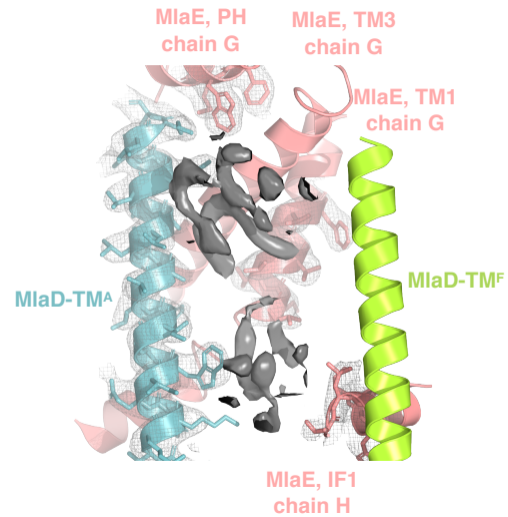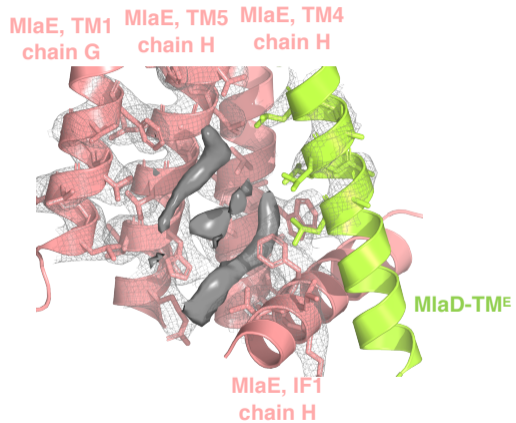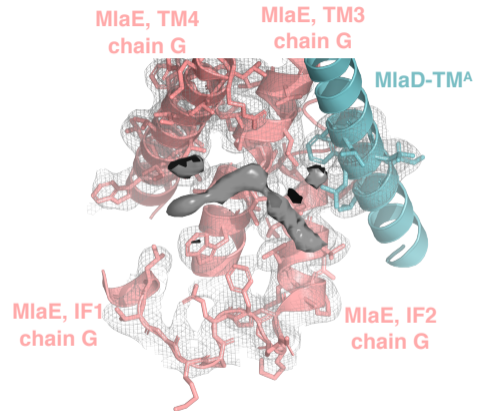

Supplement: supp [file elife-62518-supp-v1.zip › elife_poa_e62518_Figure_1_figure_supplement_5.pdf]

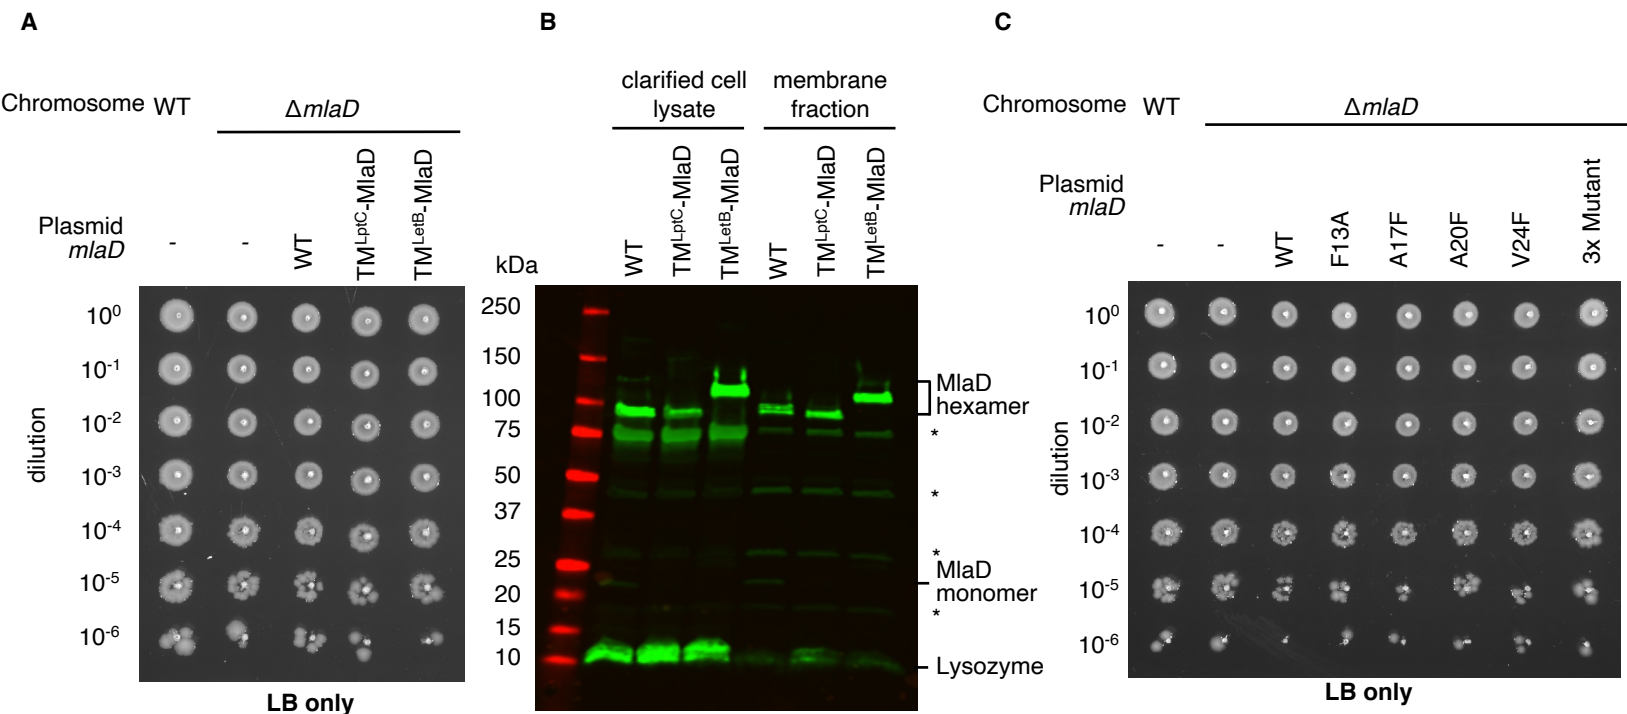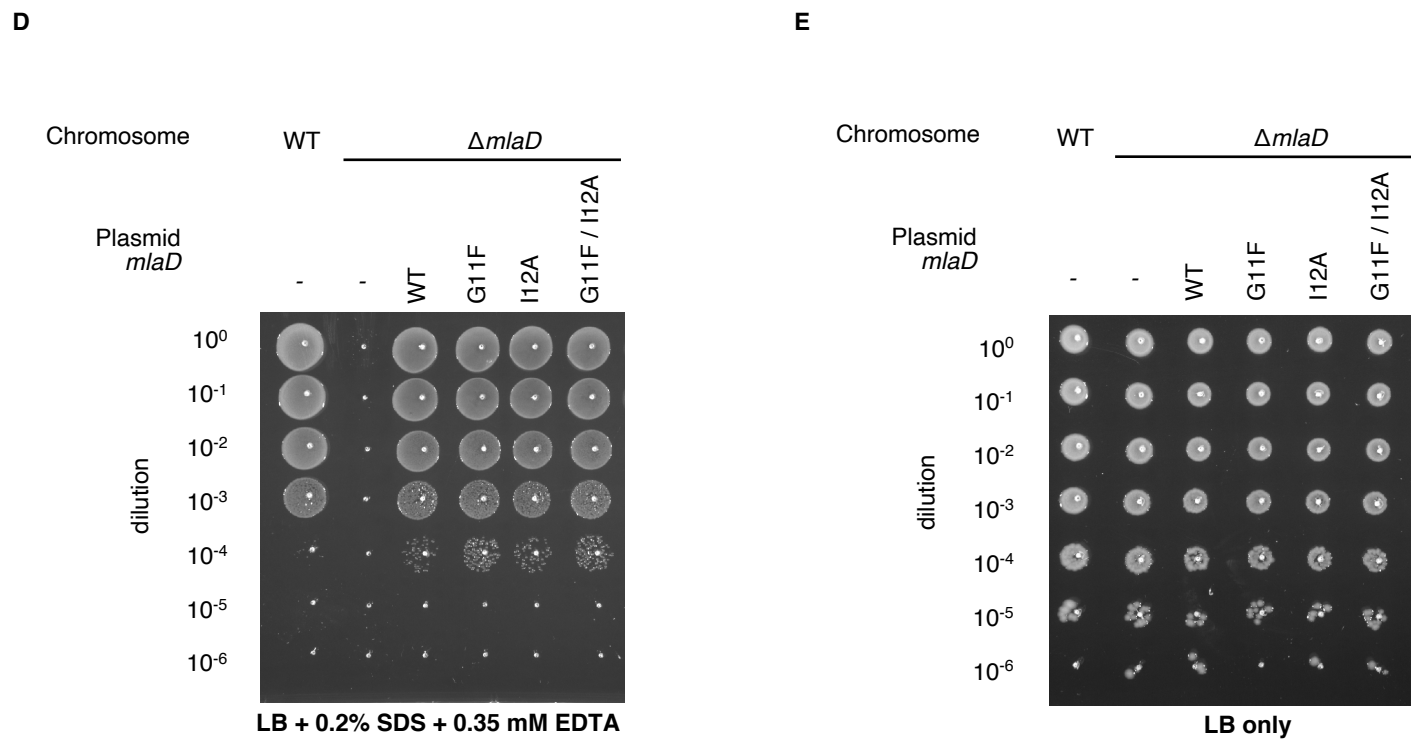

Supplement: supp [file elife-62518-supp-v1.zip › elife_poa_e62518_Figure_3_figure_supplement_2.pdf]

lipidic  
bilayer

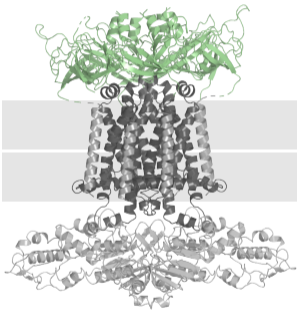

**MlaFEDB**  
*E. coli* (Gram -ve)

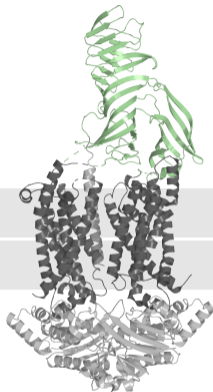

**LptBEFGC**  
*V. cholerae* (Gram -ve)

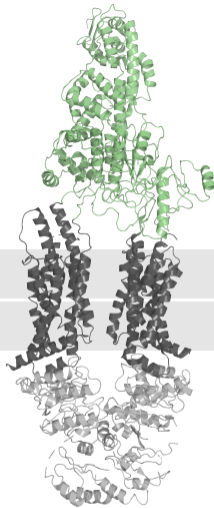

**ABCA1**  
*H. sapiens*

Supplement: supp [file elife-62518-supp-v1.zip › elife_poa_e62518_Figure_4_figure_supplement_1.pdf]

**A**

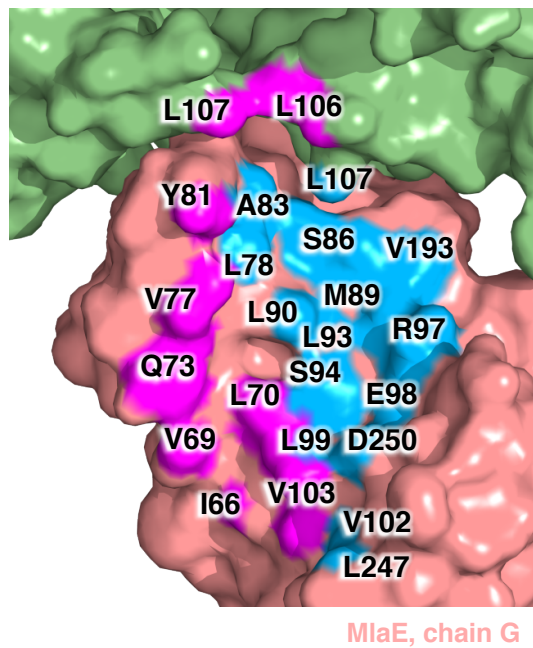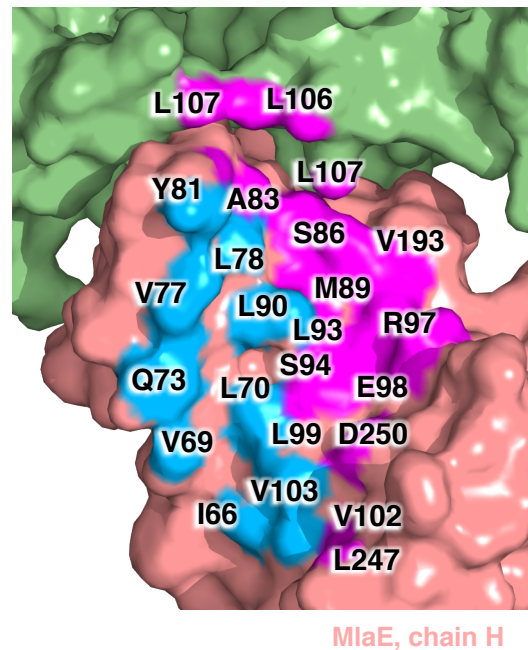

**B** periplasmic view of MlaD pore

**C**

X-Ray vs EM MlaD models

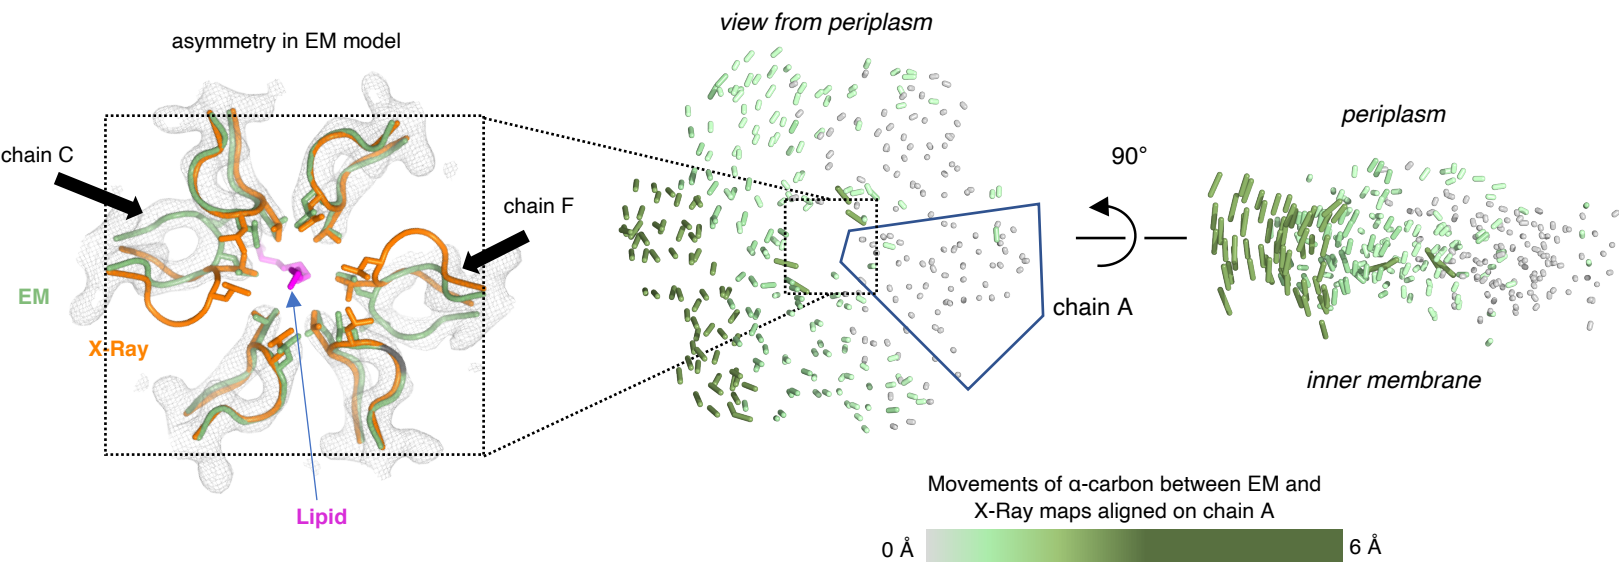

Supplement: supp [file elife-62518-supp-v1.zip › elife_poa_e62518_Figure_4_figure_supplement_2.pdf]

**A**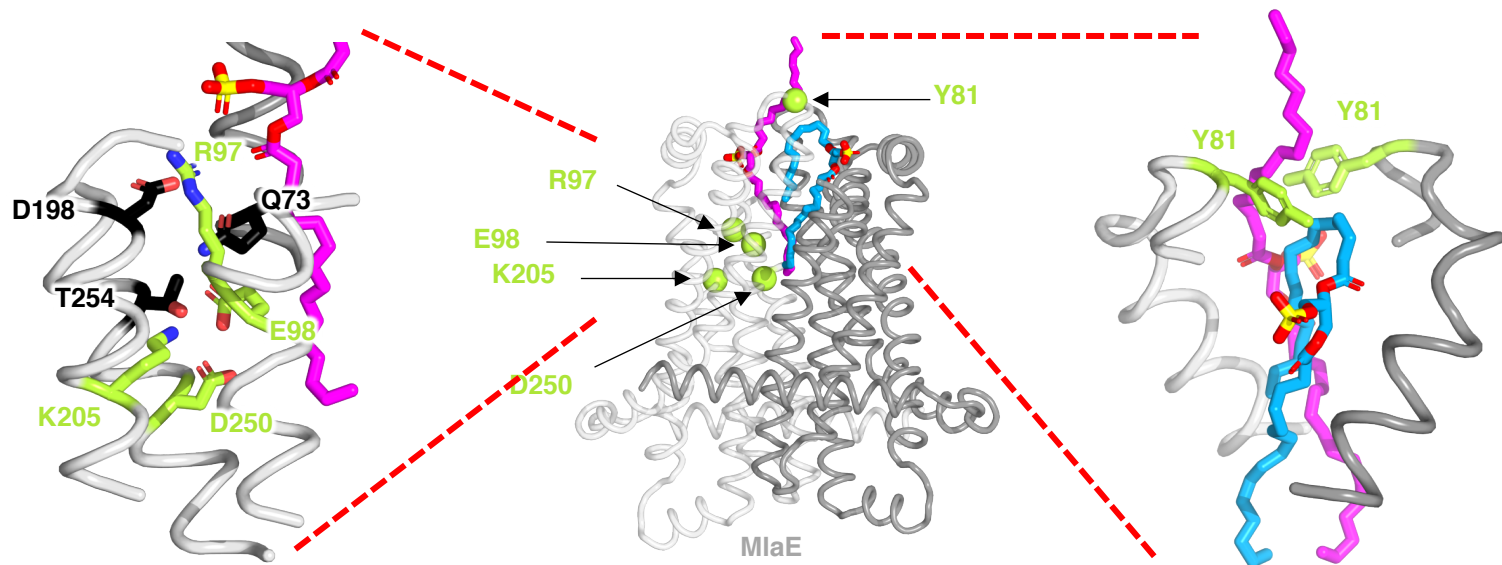**B**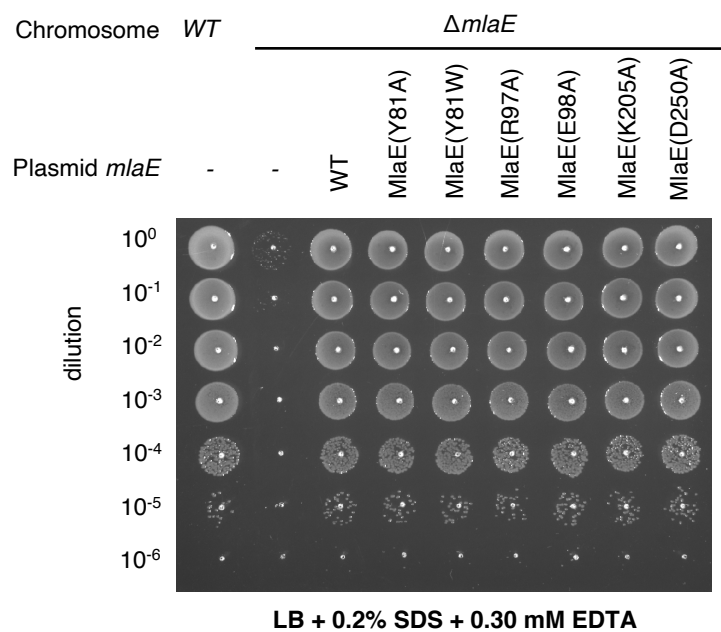**C**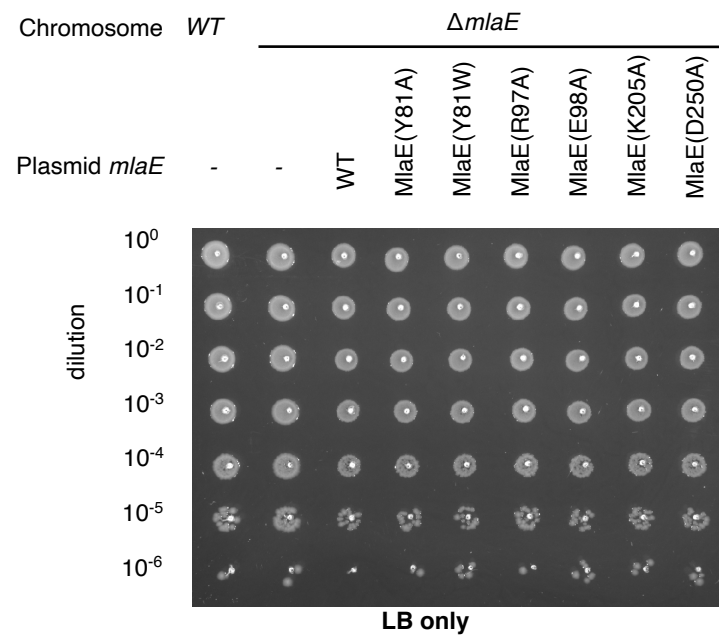

Supplement: supp [file elife-62518-supp-v1.zip › elife_poa_e62518_Figure_4_figure_supplement_3.pdf]

*E. coli*  
MlaC with 1 lipid bound

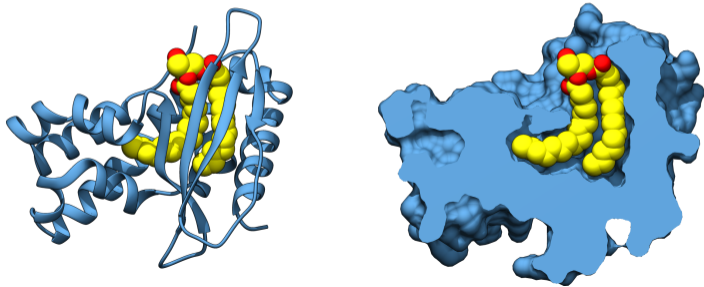

*P. putida*  
MlaC with 2 lipids bound

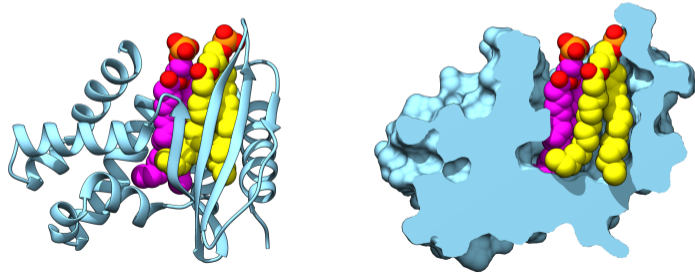

Supplement: supp [file elife-62518-supp-v1.zip › elife_poa_e62518_Figure_4_figure_supplement_4.pdf]

**A**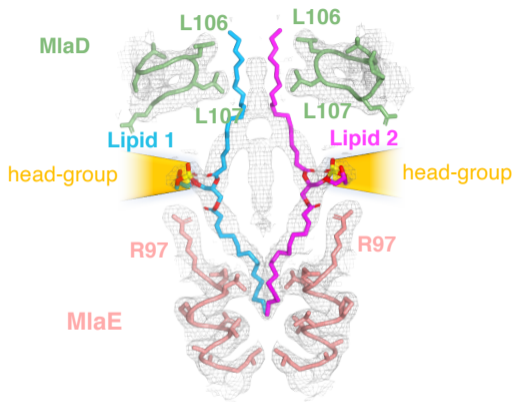

Model: PDB 7CGE (Chi et al 2020)  
Map: EMDB-30355 (Chi et al 2020)

**B**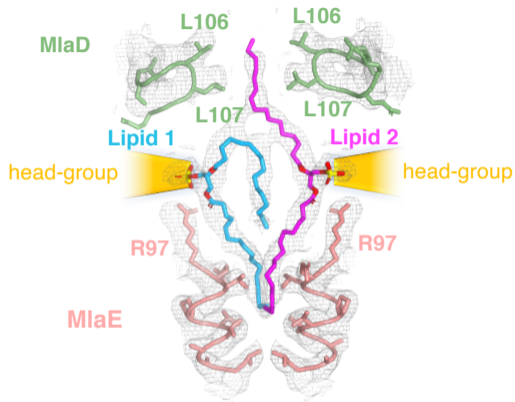

Model: PDB 6XBD (this work)  
Map: EMDB-30355 (Chi et al 2020)

Supplement: supp [file elife-62518-supp-v1.zip › elife_poa_e62518_Figure_4_figure_supplement_5.pdf]

## Crosslinked

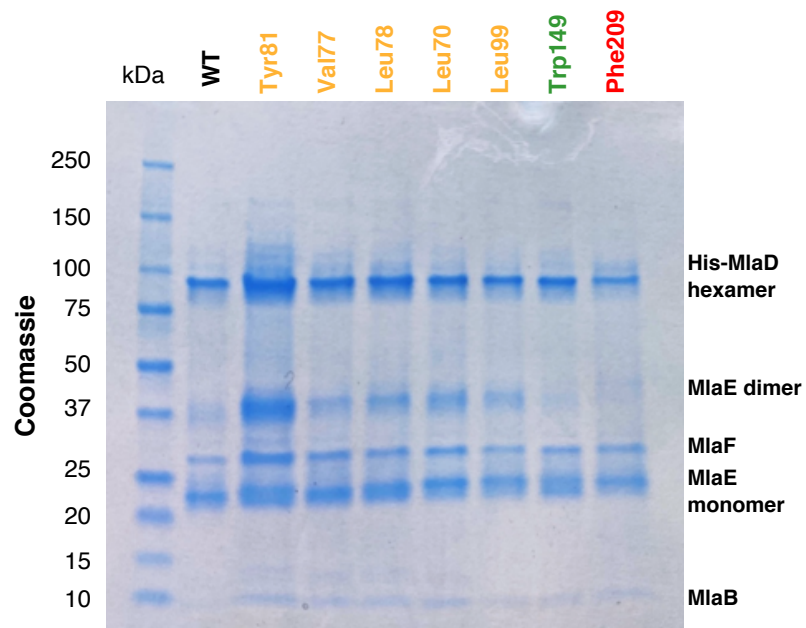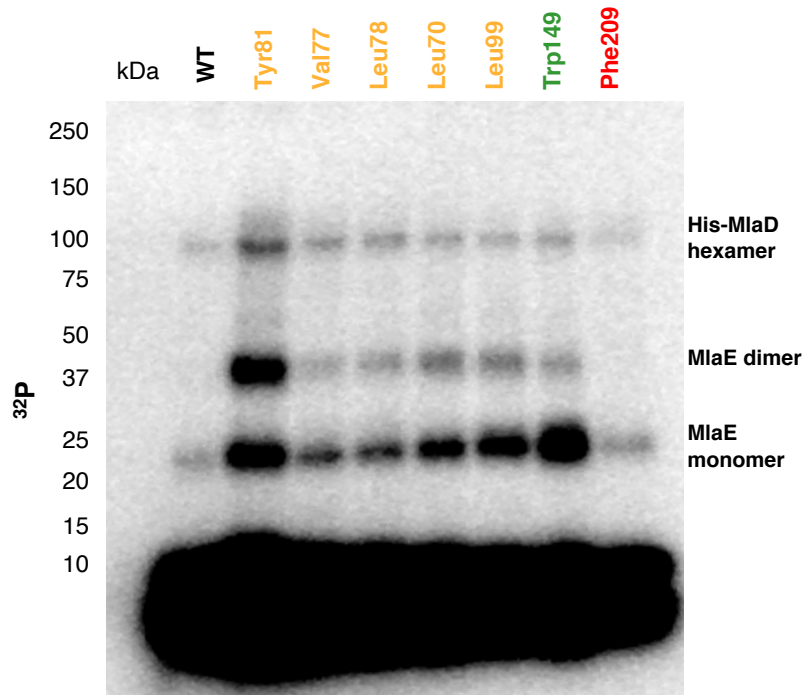

## Uncrosslinked

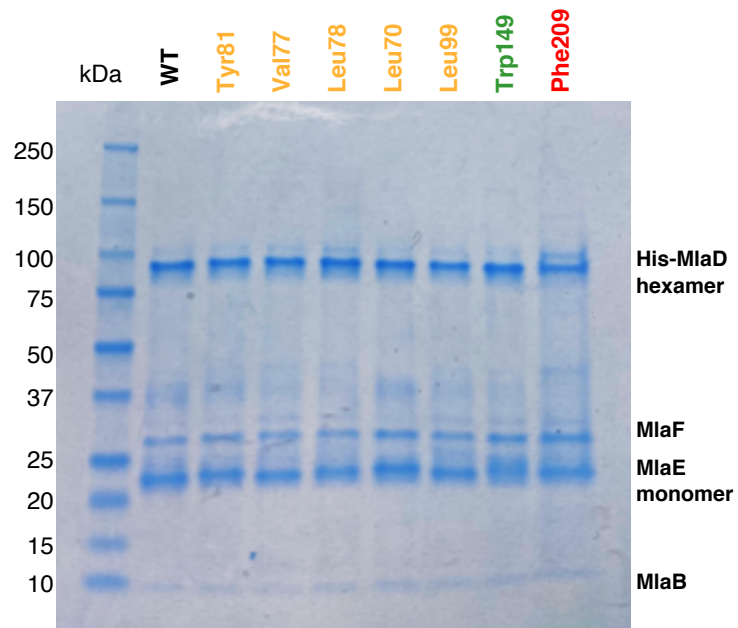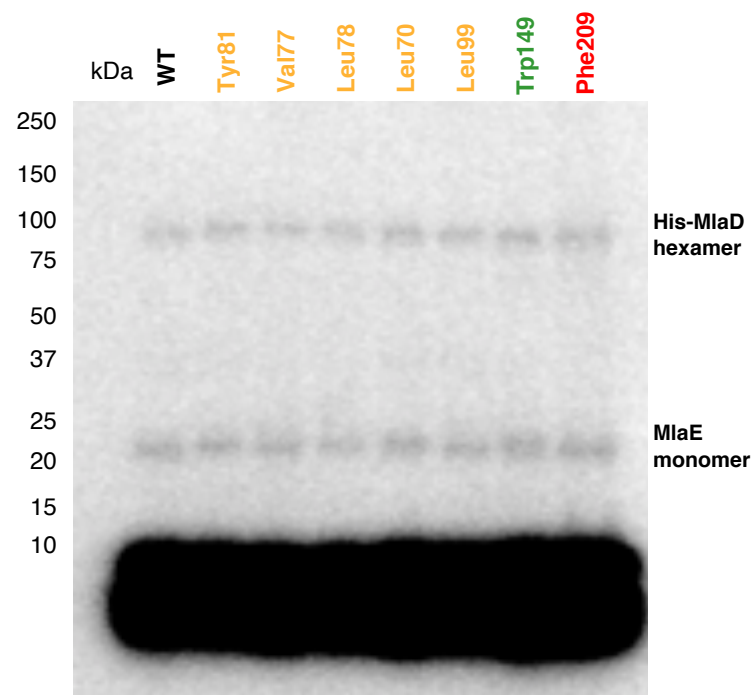

Supplement: supp [file elife-62518-supp-v1.zip › elife_poa_e62518_Figure_5_figure_supplement_1.pdf]

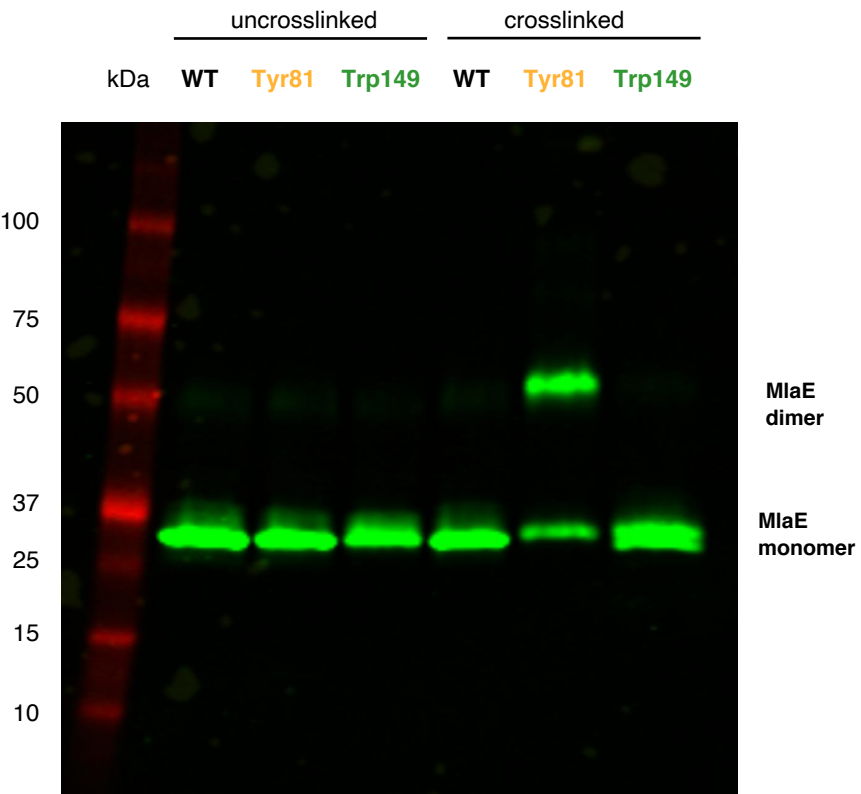

Supplement: supp [file elife-62518-supp-v1.zip › elife_poa_e62518_Figure_5_figure_supplement_2.pdf]
